# Supplementary material
Source: Springer Nature journal article supplement (https://www.springermedizin.de/resource/supplementary/12985_2013_2313_MOESM3_ESM.pdf/9606510)

# Neutralization assay

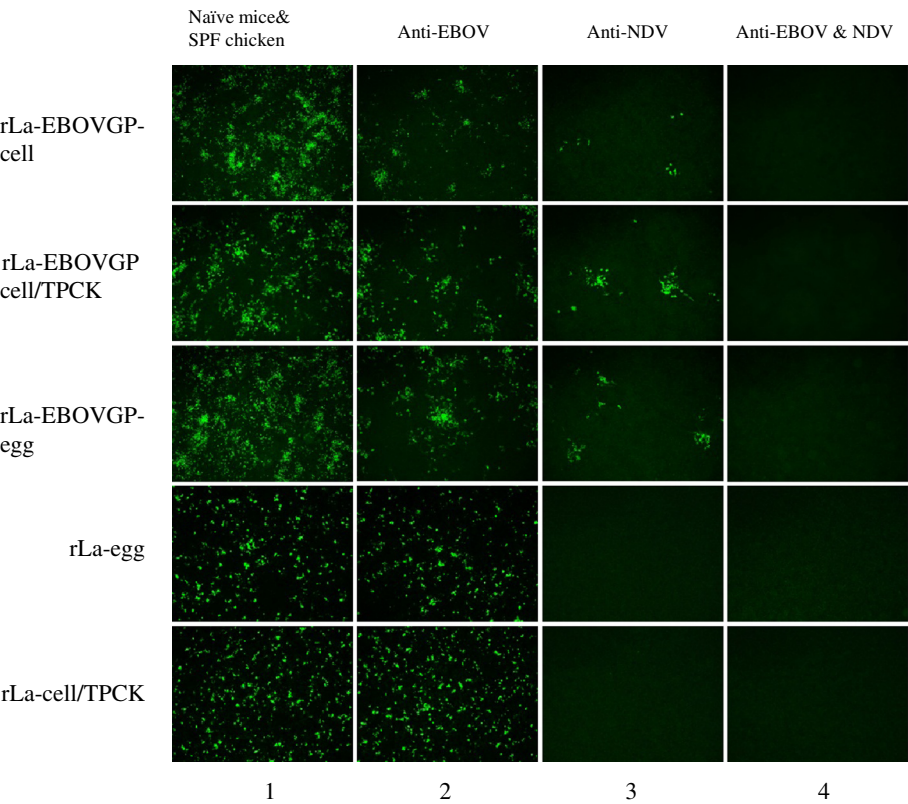

Supplement: MOESM3 [file 9606510]
